# Supplementary material for: Acid-catalysed chlorine transfer from N-chloramines to iodide ion: experimental evidence for a predicted change in mechanism
Source: Royal Society of Chemistry journal article supplement (doi:10.1039/c004976j), 2010-01-01
Supplement: c004976j.pdf [file c004976j.pdf]

## Supplementary Information

# Acid-catalysed chlorine transfer from *N*-chloramines to iodide ion: experimental evidence for a predicted change in mechanism

*Paula Calvo, Juan Crueiras\* and Ana Ríos*

Departamento de Química Física, Facultad de Química, Universidad de Santiago, 15782

Santiago de Compostela, Spain.

### Table of Contents

**Table S1:** Observed Second-Order Rate Constants,  $(k_2)_{\text{obsd}}$ , for the Reaction of Iodide Ion with *N*-Chlorodimethylamine (**1**) in Water at 25°C and  $I = 0.5$  (NaClO<sub>4</sub>).

**Table S2:** Observed Second-Order Rate Constants,  $(k_2)_{\text{obsd}}$ , for the Reaction of Iodide Ion with *N*-Chloro-2,2,2-trifluoroethylamine (**2**) in Water at 25°C and  $I = 0.5$  (NaClO<sub>4</sub>).

**Table S3:** Observed Second-Order Rate Constants,  $(k_2)_{\text{obsd}}$ , for the Reaction of Iodide Ion with *N,N*-Dichlorotaurine (**3**) in Water at 25°C and  $I = 0.5$  (NaClO<sub>4</sub>).

**Table S1:** Observed Second-Order Rate Constants,  $(k_2)_{\text{obsd}}$ , for the Reaction of Iodide Ion with N-Chlorodimethylamine (**1**) in Water at 25°C and  $I = 0.5$  (NaClO<sub>4</sub>).

| Acid catalyst | $pK_{\text{AH}}$ | $f_{\text{AH}}$     | $[\text{AH}]_{\text{T}} / \text{M}$ | pH   | $(k_2)_{\text{obsd}}^a$ ( $\text{M}^{-1}\text{s}^{-1}$ ) |                    |                    |                    |
|---------------|------------------|---------------------|-------------------------------------|------|----------------------------------------------------------|--------------------|--------------------|--------------------|
| Acetic acid   | 4.5              | 0.5                 | 0.02                                | 4.50 | $7.78 \times 10^5$                                       |                    |                    |                    |
|               |                  |                     | 0.05                                | 4.51 | $7.44 \times 10^5$                                       |                    |                    |                    |
|               |                  |                     | 0.10                                | 4.51 | $7.69 \times 10^5$                                       |                    |                    |                    |
|               |                  |                     | 0.15                                | 4.53 | $7.25 \times 10^5$                                       |                    |                    |                    |
|               |                  |                     | 0.20                                | 4.53 | $7.26 \times 10^5$                                       |                    |                    |                    |
|               |                  |                     | 0.2                                 | 0.02 | 5.11                                                     | $1.91 \times 10^5$ |                    |                    |
|               |                  |                     |                                     | 0.05 | 5.11                                                     | $1.93 \times 10^5$ |                    |                    |
|               |                  | 0.10                |                                     | 5.13 | $1.90 \times 10^5$                                       |                    |                    |                    |
|               |                  | 0.15                |                                     | 5.13 | $2.03 \times 10^5$                                       |                    |                    |                    |
|               |                  | 0.20                |                                     | 5.15 | $1.94 \times 10^5$                                       |                    |                    |                    |
|               |                  | Phosphate monoanion |                                     | 6.5  | 0.9                                                      | 0.01               | 5.52               | $8.74 \times 10^4$ |
|               |                  |                     |                                     |      |                                                          | 0.02               | 5.51               | $8.94 \times 10^4$ |
|               |                  |                     | 0.03                                |      |                                                          | 5.52               | $8.96 \times 10^4$ |                    |
|               |                  |                     | 0.04                                |      |                                                          | 5.51               | $8.57 \times 10^4$ |                    |
| 0.05          | 5.51             |                     | $8.89 \times 10^4$                  |      |                                                          |                    |                    |                    |
| 0.08          | 5.53             |                     | $9.09 \times 10^4$                  |      |                                                          |                    |                    |                    |
| 0.10          | 5.50             |                     | $8.97 \times 10^4$                  |      |                                                          |                    |                    |                    |

**Table S1:** (Continued)

| Acid catalyst       | $pK_{\text{AH}}$ | $f_{\text{AH}}$ | $[\text{AH}]_{\text{T}} / \text{M}$ | pH   | $(k_2)_{\text{obsd}}^a$ ( $\text{M}^{-1}\text{s}^{-1}$ ) |
|---------------------|------------------|-----------------|-------------------------------------|------|----------------------------------------------------------|
| Phosphate monoanion | 6.5              | 0.5             | 0.01                                | 6.48 | $9.49 \times 10^3$                                       |
|                     |                  |                 | 0.02                                | 6.48 | $9.40 \times 10^3$                                       |
|                     |                  |                 | 0.03                                | 6.48 | $9.30 \times 10^3$                                       |
|                     |                  |                 | 0.05                                | 6.51 | $9.38 \times 10^3$                                       |
|                     |                  |                 | 0.08                                | 6.53 | $9.01 \times 10^3$                                       |
|                     |                  |                 | 0.10                                | 6.55 | $9.03 \times 10^3$                                       |
| Boric acid          | 8.9              | 0.8             | 0.01                                | 8.27 | $1.49 \times 10^2$                                       |
|                     |                  |                 | 0.03                                | 8.28 | $1.41 \times 10^2$                                       |
|                     |                  |                 | 0.05                                | 8.27 | $1.47 \times 10^2$                                       |
|                     |                  |                 | 0.08                                | 8.25 | $1.56 \times 10^2$                                       |
|                     |                  |                 | 0.10                                | 8.22 | $1.66 \times 10^2$                                       |

<sup>a</sup> Determined as the slope of a linear plot of  $k_{\text{obsd}}$  ( $\text{s}^{-1}$ ) against the total concentration of iodide ion or as

$$(k_2)_{\text{obsd}} = k_{\text{obsd}} / [\text{I}^-]_{\text{T}}$$

**Table S2:** Observed Second-Order Rate Constants,  $(k_2)_{\text{obsd}}$ , for the Reaction of Iodide Ion with *N*-Chloro-2,2,2-trifluoroethylamine (**2**) in Water at 25°C and  $I = 0.5$  (NaClO<sub>4</sub>).

| Acid catalyst      | $pK_{\text{AH}}$ | $f_{\text{AH}}$ | $[\text{AH}]_{\text{T}} / \text{M}$ | pH   | $(k_2)_{\text{obsd}}^a$ ( $\text{M}^{-1}\text{s}^{-1}$ ) |
|--------------------|------------------|-----------------|-------------------------------------|------|----------------------------------------------------------|
| Chloroacetic acid  | 2.6              | 0.2             | 0.01                                | 3.20 | $8.89 \times 10^4$                                       |
|                    |                  |                 | 0.03                                | 3.18 | $9.39 \times 10^4$                                       |
|                    |                  |                 | 0.05                                | 3.16 | $1.02 \times 10^5$                                       |
|                    |                  |                 | 0.08                                | 3.16 | $1.05 \times 10^5$                                       |
|                    |                  |                 | 0.10                                | 3.16 | $1.06 \times 10^5$                                       |
| Methoxyacetic acid | 3.3              | 0.5             | 0.01                                | 3.32 | $6.92 \times 10^4$                                       |
|                    |                  |                 | 0.03                                | 3.28 | $7.74 \times 10^4$                                       |
|                    |                  |                 | 0.05                                | 3.27 | $8.03 \times 10^4$                                       |
|                    |                  |                 | 0.08                                | 3.26 | $8.33 \times 10^4$                                       |
|                    |                  |                 | 0.10                                | 3.26 | $8.46 \times 10^4$                                       |
| Acetic acid        | 4.5              | 0.5             | 0.01                                | 4.48 | $4.73 \times 10^3$                                       |
|                    |                  |                 | 0.03                                | 4.47 | $4.89 \times 10^3$                                       |
|                    |                  |                 | 0.05                                | 4.47 | $5.01 \times 10^3$                                       |
|                    |                  |                 | 0.08                                | 4.48 | $5.11 \times 10^3$                                       |
|                    |                  |                 | 0.10                                | 4.48 | $5.17 \times 10^3$                                       |

**Table S2:** (Continued)

| Acid catalyst       | $pK_{AH}$ | $f_{AH}$ | $[AH]_T / M$ | pH   | $(k_2)_{obsd}^a (M^{-1}s^{-1})$ |
|---------------------|-----------|----------|--------------|------|---------------------------------|
| Phosphate monoanion | 6.5       | 0.5      | 0.01         | 6.47 | 60.2                            |
|                     |           |          | 0.03         | 6.49 | 64.2                            |
|                     |           |          | 0.05         | 6.51 | 65.3                            |
|                     |           |          | 0.08         | 6.53 | 68.3                            |
|                     |           |          | 0.10         | 6.55 | 71.2                            |
| Boric acid          | 8.9       | 0.8      | 0.01         | 8.26 | 0.867                           |
|                     |           |          | 0.03         | 8.27 | 0.970                           |
|                     |           |          | 0.05         | 8.26 | 1.03                            |
|                     |           |          | 0.08         | 8.24 | 1.05                            |
|                     |           |          | 0.10         | 8.23 | 1.10                            |

<sup>a</sup> Determined as the slope of a linear plot of  $k_{obsd} (s^{-1})$  against the total concentration of iodide ion or as

$$(k_2)_{obsd} = k_{obsd} / [I]_T.$$

**Table S3:** Observed Second-Order Rate Constants,  $(k_2)_{\text{obsd}}$ , for the Reaction of Iodide Ion with *N,N*-Dichlorotaurine (**3**) in Water at 25°C and  $I = 0.5$  (NaClO<sub>4</sub>).

|                                                         |                      | $(k_2)_{\text{obsd}}^a$ (M <sup>-1</sup> s <sup>-1</sup> )                                    |                                                                                            |                                                                                               |                                                                                               |
|---------------------------------------------------------|----------------------|-----------------------------------------------------------------------------------------------|--------------------------------------------------------------------------------------------|-----------------------------------------------------------------------------------------------|-----------------------------------------------------------------------------------------------|
| Dichloroacetic acid<br>(p <i>K</i> <sub>AH</sub> = 1.1) | [AH] <sub>T</sub> /M | [AH]/[A <sup>-</sup> ] = 4<br>[H <sub>3</sub> O <sup>+</sup> ] = 0.22 M                       | [AH]/[A <sup>-</sup> ] = 1<br>[H <sub>3</sub> O <sup>+</sup> ] = 0.055 M                   | [AH]/[A <sup>-</sup> ] = 0.25<br>[H <sub>3</sub> O <sup>+</sup> ] = 0.014 M                   |                                                                                               |
|                                                         | 0.04                 | 4.45 × 10 <sup>4</sup>                                                                        | 1.31 × 10 <sup>4</sup>                                                                     | 3.66 × 10 <sup>3</sup>                                                                        |                                                                                               |
|                                                         | 0.10                 | 4.87 × 10 <sup>4</sup>                                                                        | 1.55 × 10 <sup>4</sup>                                                                     | 4.32 × 10 <sup>3</sup>                                                                        |                                                                                               |
|                                                         | 0.20                 | 5.27 × 10 <sup>4</sup>                                                                        | 1.82 × 10 <sup>4</sup>                                                                     | 5.30 × 10 <sup>3</sup>                                                                        |                                                                                               |
|                                                         | 0.30                 | 5.59 × 10 <sup>4</sup>                                                                        | 2.10 × 10 <sup>4</sup>                                                                     | 5.92 × 10 <sup>3</sup>                                                                        |                                                                                               |
|                                                         | 0.40                 | 6.05 × 10 <sup>4</sup>                                                                        | —                                                                                          | 6.62 × 10 <sup>3</sup>                                                                        |                                                                                               |
| Chloroacetic acid<br>(p <i>K</i> <sub>AH</sub> = 2.6)   | [AH] <sub>T</sub> /M | [AH]/[A <sup>-</sup> ] = 2.33<br>[H <sub>3</sub> O <sup>+</sup> ] = 6.03 × 10 <sup>-3</sup> M | [AH]/[A <sup>-</sup> ] = 1<br>[H <sub>3</sub> O <sup>+</sup> ] = 2.34 × 10 <sup>-3</sup> M | [AH]/[A <sup>-</sup> ] = 0.43<br>[H <sub>3</sub> O <sup>+</sup> ] = 1.26 × 10 <sup>-3</sup> M | [AH]/[A <sup>-</sup> ] = 0.25<br>[H <sub>3</sub> O <sup>+</sup> ] = 6.31 × 10 <sup>-4</sup> M |
|                                                         | 0.04                 | —                                                                                             | 5.18 × 10 <sup>2</sup>                                                                     | 2.38 × 10 <sup>2</sup>                                                                        | 1.70 × 10 <sup>2</sup>                                                                        |
|                                                         | 0.10                 | 1.18 × 10 <sup>3</sup>                                                                        | 6.72 × 10 <sup>2</sup>                                                                     | 3.16 × 10 <sup>2</sup>                                                                        | 2.16 × 10 <sup>2</sup>                                                                        |
|                                                         | 0.20                 | 1.48 × 10 <sup>3</sup>                                                                        | 8.77 × 10 <sup>2</sup>                                                                     | 4.15 × 10 <sup>2</sup>                                                                        | 2.81 × 10 <sup>2</sup>                                                                        |
|                                                         | 0.30                 | 1.65 × 10 <sup>3</sup>                                                                        | 1.04 × 10 <sup>3</sup>                                                                     | 5.12 × 10 <sup>2</sup>                                                                        | 3.38 × 10 <sup>2</sup>                                                                        |
|                                                         | 0.40                 | 1.94 × 10 <sup>3</sup>                                                                        | 1.20 × 10 <sup>3</sup>                                                                     | 6.12 × 10 <sup>2</sup>                                                                        | 4.01 × 10 <sup>2</sup>                                                                        |

**Table S3:** (Continued)

|                                 |                                     | $(k_2)_{\text{obsd}}^a$ ( $\text{M}^{-1}\text{s}^{-1}$ ) |                                                          |                                                          |                                                          |                                                          |
|---------------------------------|-------------------------------------|----------------------------------------------------------|----------------------------------------------------------|----------------------------------------------------------|----------------------------------------------------------|----------------------------------------------------------|
| Methoxyacetic acid              |                                     | $[\text{AH}]/[\text{A}^-] = 4$                           |                                                          | $[\text{AH}]/[\text{A}^-] = 1$                           | $[\text{AH}]/[\text{A}^-] = 0.25$                        |                                                          |
| $(\text{p}K_{\text{AH}} = 3.4)$ | $[\text{AH}]_{\text{T}} / \text{M}$ | $[\text{H}_3\text{O}^+] = 1.51 \times 10^{-3} \text{ M}$ |                                                          | $[\text{H}_3\text{O}^+] = 4.79 \times 10^{-4} \text{ M}$ | $[\text{H}_3\text{O}^+] = 1.20 \times 10^{-4} \text{ M}$ |                                                          |
|                                 | 0.04                                | $3.56 \times 10^2$                                       |                                                          | $1.30 \times 10^2$                                       | $4.10 \times 10^1$                                       |                                                          |
|                                 | 0.10                                | $4.87 \times 10^2$                                       |                                                          | $1.86 \times 10^2$                                       | $6.22 \times 10^1$                                       |                                                          |
|                                 | 0.20                                | $6.09 \times 10^2$                                       |                                                          | $2.56 \times 10^2$                                       | $8.92 \times 10^1$                                       |                                                          |
|                                 | 0.30                                | $7.82 \times 10^2$                                       |                                                          | $3.27 \times 10^2$                                       | $1.19 \times 10^2$                                       |                                                          |
|                                 | 0.40                                | $9.04 \times 10^2$                                       |                                                          | $4.28 \times 10^2$                                       | $1.61 \times 10^2$                                       |                                                          |
| Acetic acid                     |                                     | $[\text{AH}]/[\text{A}^-] = 4$                           | $[\text{AH}]/[\text{A}^-] = 2.33$                        | $[\text{AH}]/[\text{A}^-] = 1$                           | $[\text{AH}]/[\text{A}^-] = 0.43$                        | $[\text{AH}]/[\text{A}^-] = 0.25$                        |
| $(\text{p}K_{\text{AH}} = 4.6)$ | $[\text{AH}]_{\text{T}} / \text{M}$ | $[\text{H}_3\text{O}^+] = 1.26 \times 10^{-4} \text{ M}$ | $[\text{H}_3\text{O}^+] = 8.13 \times 10^{-5} \text{ M}$ | $[\text{H}_3\text{O}^+] = 3.31 \times 10^{-5} \text{ M}$ | $[\text{H}_3\text{O}^+] = 1.55 \times 10^{-5} \text{ M}$ | $[\text{H}_3\text{O}^+] = 1.02 \times 10^{-5} \text{ M}$ |
|                                 | 0.04                                | $4.72 \times 10^1$                                       | $3.46 \times 10^1$                                       | $2.15 \times 10^1$                                       | $1.86 \times 10^1$                                       | $1.66 \times 10^1$                                       |
|                                 | 0.10                                | $6.28 \times 10^1$                                       | $5.28 \times 10^1$                                       | $2.94 \times 10^1$                                       | $2.31 \times 10^1$                                       | $2.01 \times 10^1$                                       |
|                                 | 0.20                                | $8.98 \times 10^1$                                       | $7.78 \times 10^1$                                       | $4.70 \times 10^1$                                       | $3.29 \times 10^1$                                       | $2.45 \times 10^1$                                       |
|                                 | 0.30                                | $1.19 \times 10^2$                                       | $9.89 \times 10^1$                                       | $6.75 \times 10^1$                                       | $4.30 \times 10^1$                                       | $3.48 \times 10^1$                                       |
|                                 | 0.40                                | $1.47 \times 10^2$                                       | $1.30 \times 10^2$                                       | $8.70 \times 10^1$                                       | $5.33 \times 10^1$                                       | $4.59 \times 10^1$                                       |

**Table S3:** (Continued)

|                                                          |                                   | $(k_2)_{\text{obsd}}^a$ ( $\text{M}^{-1}\text{s}^{-1}$ )                                   |                                                                                            |                                                                                               |
|----------------------------------------------------------|-----------------------------------|--------------------------------------------------------------------------------------------|--------------------------------------------------------------------------------------------|-----------------------------------------------------------------------------------------------|
| Phosphate monoanion<br>( $\text{p}K_{\text{AH}} = 6.5$ ) | $[\text{AH}]_{\text{T}}/\text{M}$ | $[\text{AH}]/[\text{A}^-] = 4$<br>$[\text{H}_3\text{O}^+] = 1.51 \times 10^{-6} \text{ M}$ | $[\text{AH}]/[\text{A}^-] = 1$<br>$[\text{H}_3\text{O}^+] = 3.31 \times 10^{-7} \text{ M}$ | $[\text{AH}]/[\text{A}^-] = 0.25$<br>$[\text{H}_3\text{O}^+] = 8.13 \times 10^{-8} \text{ M}$ |
|                                                          | 0.02                              | $1.47 \times 10^1$                                                                         | $1.36 \times 10^1$                                                                         | $1.29 \times 10^1$                                                                            |
|                                                          | 0.06                              | $1.92 \times 10^1$                                                                         | $1.62 \times 10^1$                                                                         | $1.42 \times 10^1$                                                                            |
|                                                          | 0.10                              | $2.27 \times 10^1$                                                                         | $1.79 \times 10^1$                                                                         | $1.49 \times 10^1$                                                                            |
|                                                          | 0.15                              | $2.76 \times 10^1$                                                                         | $2.13 \times 10^1$                                                                         | —                                                                                             |

<sup>a</sup> Determined as the slope of a linear plot of  $k_{\text{obsd}}$  ( $\text{s}^{-1}$ ) against the total concentration of iodide ion or as  $(k_2)_{\text{obsd}} = k_{\text{obsd}}/[\text{I}^-]_{\text{T}}$ .
